# Supplementary material for: Do Obesity-Related Traits Affect Prostate Cancer Risk through Serum Testosterone? A Mendelian Randomization Study
Source: MDPI journal article supplement (doi:10.3390/cancers15194884), 2023-10-08
Supplement: s1 [file s1]

## Supplementary Method S1:

### MR assumption and results interpretation

The MR analysis relies on three important assumptions to get robust results: 1) relevance: the IVs must be robustly related to the exposure, (2) independence: the IVs must not be related to confounders, and (3) exclusion restriction: IVs must only influence the outcome via the exposure. We only selected genome-wide significant associated ( $P\text{-value} < 5 \times 10^{-8}$ ) index SNPs to meet assumption 1. Besides, the calculated F-statistics for obesity-related traits were all greater than 10 (supplementary table 2-4), which minimized the possibility of weak instrumental variables <sup>[1]</sup>. Additionally, we excluded one of each pair of genetic variants that are in linkage disequilibrium (LD) ( $r^2 < 0.01$ , LD distance  $> 10,000\text{kb}$ ), and conduct additional sensitivity analyses (MR-Egger, weighted median, and weighted mode methods), Steiger filtering and MR-PRESSO for reduction of pleiotropic effects (assumptions 2 and 3) <sup>[2]</sup>. Moreover, we estimated the heterogeneity using Cochran's Q statistic to further test assumptions 2 and 3, since the existence of heterogeneity may result from the pleiotropy of SNPs.

If the results met the following criteria, we would consider the existence of a potential mediating role: 1) a causal effect of a specific obesity-related anthropometric item on PCa was demonstrated in the first step; 2) a causal effect of specific serum testosterone on PCa was demonstrated in the second step; 3) a unidirectional causal effect of a specific obesity-related anthropometric item on the specific serum testosterone was indicated in the third step; 4) the causal effect of a specific obesity-related anthropometric item on PCa were weakened when adjusted for specific serum testosterone, while the causal effect of specific serum testosterone on PCa remain consistent when adjusted for a specific obesity-related anthropometric in the fourth step. 5) an indirect causal effect, but not a direct causal effect of a specific obesity-related anthropometric item on PCa, and an indirect causal effect of specific serum testosterone was confirmed in the fourth step.

- [1] Burgess S, Thompson S G. Avoiding bias from weak instruments in Mendelian randomization studies [J]. Int J Epidemiol, 2011, 40(3): 755-764.
- [2] Andersen M L, Alvarenga T F, Mazaro-Costa R, et al. The association of testosterone, sleep, and sexual function in men and women [J]. Brain Res, 2011, 1416.

**Supplementary Table S1:** The characteristics of GWAS summary statistics used in main analyses.

GWAS, genome-wide association study; SNP, single nucleotide polymorphism; SD, standard deviation; BMI, Body Mass Index; WHR, waist-to-hip ratio; WHRadjBMI, waist-to-hip ratio adjusted for body mass index; GIANT; Genetic Investigation of ANthropometric Traits; UKB, UK biobank; PRACTICAL, Prostate Cancer Association Group to Investigate Cancer-Associated Alterations in the Genome; BT, Bioavailable testosterone; TT, total testosterone; SHBG, sex hormone-binding globulin; SD, standard deviation

| Items                    | Subitems                  | Population                                                                          | Trait or case definition                                                                                                                           | Adjusted covariates                                                                 | PMID     | Units | Sample size in UK Biobank                   |
|--------------------------|---------------------------|-------------------------------------------------------------------------------------|----------------------------------------------------------------------------------------------------------------------------------------------------|-------------------------------------------------------------------------------------|----------|-------|---------------------------------------------|
| Exposure                 |                           |                                                                                     |                                                                                                                                                    |                                                                                     |          |       |                                             |
| Obesity-related traits   | BMI                       | European: 806,834 individuals (including 374,756 males) of GIANT consortium and UKB | BMI = kg/m <sup>2</sup> where kg is a person's weight in kilograms and m <sup>2</sup> is their standing height in metres squared.                  | sex, age, and age-squared at the time of evaluation, and the evaluation center      | 30239722 | SD    | 484,680 individuals including 221,863 males |
|                          | WHR                       | European: 697,734 individuals (including 316,772 males) of GIANT consortium and UKB | the waist circumference data from UKB was divided by hip circumference                                                                             | sex, age, and age-squared at the time of evaluation, and the evaluation center      | 30239722 | SD    | 485,486 individuals including 222,338 males |
|                          | WHRadjBMI                 | European: 694,649 individuals (including 315,284 males) of GIANT consortium and UKB | Regress the WHR measure on BMI, sex, age, and age-squared at the time of evaluation, and the evaluation center.                                    | BMI, sex, age, and age-squared at the time of evaluation, and the evaluation center | 30239722 | SD    | 484,563 individuals including 221,804 males |
| <i>Mediator</i>          |                           |                                                                                     |                                                                                                                                                    |                                                                                     |          |       |                                             |
| Serum testosterone level | Bioavailable testosterone | European: 178,782 males                                                             | From blood sample collected at the initial visit. Testosterone was measured in nmol/L by one-step competitive analysis on a Beckman Coulter Unicel | Fasting time, age, centre, chip/release of genetic data                             | 32042192 | SD    | 178,782                                     |

|                    |                                                                               |                                                                                                                                                                                                                                                                                                                                   |                                                         |          |    |         |
|--------------------|-------------------------------------------------------------------------------|-----------------------------------------------------------------------------------------------------------------------------------------------------------------------------------------------------------------------------------------------------------------------------------------------------------------------------------|---------------------------------------------------------|----------|----|---------|
| SHBG               | European: 180,094 males                                                       | Dxl 800. SHBG was measured in nmol/L by two-step sandwich immunoassay analysis on a Beckman Coulter Unicel Dxl 800. Albumin measured in g/L by BCG analysis on a Beckman Coulter AU5800. From blood sample collected at the initial visit. Measured by two-step sandwich immunoassay analysis on a Beckman Coulter Unicel Dxl 800 | Age, BMI, batch, dilution                               | 32042192 | SD | 180,094 |
|                    |                                                                               |                                                                                                                                                                                                                                                                                                                                   |                                                         |          |    |         |
| Total testosterone | European: 194,453 males                                                       | From blood sample collected at the initial visit. Measured in nmol/L by one-step competitive analysis on a Beckman Coulter Unicel Dxl 800.                                                                                                                                                                                        | Fasting time, age, centre, chip/release of genetic data | 32042192 | SD | 194,453 |
| <b>Outcome</b>     |                                                                               |                                                                                                                                                                                                                                                                                                                                   |                                                         |          |    |         |
| Prostate cancer    | European: PRACTICAL consortium including 79,194 PCa cases and 61,112 controls | low aggressive (tumor stage <=T1 and Gleason score [GS] <=6 and PSA<10), intermediate aggressive (T2 or GS7 or PSA 10-20), high aggressive (T3/T4 or N1 or M1 or GS>=8 or PSA>20) and advanced (metastatic disease or GS>=8 or PSA>100 or PCa death)                                                                              | ancestry, country, principal components, and so forth   | 29892016 | /  | 0       |

Supplementary Table S2: Proportion of variance explained and F statistics for obesity-related traits on prostate cancer.

BMI, Body Mass Index; WHR, waist-to-hip ratio; WHRadjBMI, waist-to-hip ratio adjusted for body mass index; SNP, single nucleotide polymorphism

| Variables                | The sample size of exposure | The sample size of the outcome | SNPs | The proportion of variance explained | F statistics |
|--------------------------|-----------------------------|--------------------------------|------|--------------------------------------|--------------|
| Male-specific instrument |                             |                                |      |                                      |              |
| BMI                      | 374,765                     | 79,194                         | 191  | 2.57%                                | 52           |
| WHR                      | 316,772                     | 79,194                         | 59   | 0.81%                                | 44           |
| WHRadjBMI                | 315,284                     | 79,194                         | 74   | 1.04%                                | 48           |
| Combined-sex instrument  |                             |                                |      |                                      |              |
| BMI                      | 806,834                     | 79,194                         | 540  | 5.01%                                | 79           |
| WHR                      | 697,734                     | 79,194                         | 250  | 2.51%                                | 72           |
| WHRadjBMI                | 694,649                     | 79,194                         | 283  | 2.98%                                | 75           |

The proportion of variance in the exposure explained by the genetic variants was calculated using the TwoSampleMR R functions `get_r_from_pn()`.

The F statistics related to the proportion of variance in the exposure explained by the genetic variants( $R^2$ ), sample size( $N$ ), and the number of instruments( $K$ ) were calculated by the formula  $F = ((N-K-1)/K) \cdot (R^2/(1-R^2))$ .

Supplementary Table S3: Proportion of variance explained and F statistics for serum testosterone on prostate cancer.

SNP, single nucleotide polymorphism

| Variables                    | The sample size of exposure | The sample size of the outcome | SNPs | The proportion of variance explained | F statistics |
|------------------------------|-----------------------------|--------------------------------|------|--------------------------------------|--------------|
| bioavailable testosterone    | 178,782                     | 79,194                         | 62   | 1.29%                                | 38           |
| sex hormone-binding globulin | 180,094                     | 79,194                         | 206  | 4.51%                                | 41           |
| total testosterone           | 194,453                     | 79,194                         | 131  | 2.44%                                | 37           |

the proportion of variance in the exposure explained by the genetic variants was calculated using the TwoSampleMR R functions `get_r_from_pn()`.

The F statistics related to the proportion of variance in the exposure explained by the genetic variants( $R^2$ ), sample size( $N$ ), and the number of instruments( $K$ ) were calculated by the formula  $F = ((N-K-1)/K) \cdot (R^2/(1-R^2))$ .

Supplementary Table S4: Proportion of variance explained and F statistics for bidirectional MR between obesity-related traits and serum testosterone.  
SNP, single nucleotide polymorphism

| Variables                 | The sample size of exposure | The sample size of the outcome | SNPs | The proportion of variance explained | F statistics |
|---------------------------|-----------------------------|--------------------------------|------|--------------------------------------|--------------|
| BMI                       | 374,765                     | 178,782                        | 188  | 2.52%                                | 52           |
| bioavailable testosterone | 178,782                     | 374,765                        | 62   | 1.24%                                | 36           |

the proportion of variance in the exposure explained by the genetic variants was calculated using the TwoSampleMR R functions `get_r_from_pn()`.

The F statistics related to the proportion of variance in the exposure explained by the genetic variants( $R^2$ ), sample size( $N$ ), and the number of instruments( $K$ ) were calculated by the formula  $F = ((N-K-1)/K) \cdot (R^2/(1-R^2))$ .

Supplementary Table S5: Results of the main analysis for univariable MR and bidirectional MR.

BMI, Body Mass Index; WHR, waist-to-hip ratio; WHRadjBMI, waist-to-hip ratio adjusted for body mass index; PCa, prostate cancer; SNP, single nucleotide polymorphism; IVW, inverse variance weighted; MR-PRESSO, MR Pleiotropy RESidual Sum and Outlier; UVMR, univariable MR; BT, Bioavailable testosterone; TT, total testosterone; SHBG, sex hormone-binding globulin; SD, standard deviation

| Exposures                      | Outcome | SNPs* | IVW OR beta p-value     | IVW p-value | Q        | Q_df | IVW SNP heterogeneity p-value | IVW SNP heterogeneity I <sup>2</sup> | SNPs** | IVW after MR-PRESSO OR/ Beta (95% CI) | IVW after MR-PRESSO p-value*** | Q           | Q_df | IVW after MR-PRESSO SNP heterogeneity p-value | IVW after MR-PRESSO SNP heterogeneity I <sup>2</sup> | MR-Egger Intercept p-value |
|--------------------------------|---------|-------|-------------------------|-------------|----------|------|-------------------------------|--------------------------------------|--------|---------------------------------------|--------------------------------|-------------|------|-----------------------------------------------|------------------------------------------------------|----------------------------|
| UVMR: Male-specific instrument |         |       |                         |             |          |      |                               |                                      |        |                                       |                                |             |      |                                               |                                                      |                            |
| BMI                            | PCa     | 193   | 0.94 (0.88-1.01)        | 0.11        | 310.673  | 192  | 1.25E-07                      | 38.20%                               | 191    | 0.93(0.87-0.99)                       | 0.047                          | 288.5933741 | 190  | 5.13E-06                                      | 34.16%                                               | 0.071908                   |
| WHR                            | PCa     | 64    | 1.05 (0.88-1.25)        | 0.59        | 196.0003 | 63   | 1.46E-15                      | 67.86%                               | 59     | 0.98(0.84-1.13)                       | 0.76                           | 113.3594229 | 58   | 1.90E-05                                      | 48.84%                                               | 0.080695                   |
| WHRadjBMI                      | PCa     | 79    | 0.99(0.87-1.14)         | 0.96        | 194.029  | 78   | 7.24E-12                      | 59.80%                               | 74     | 0.94(0.84-1.05)                       | 0.29                           | 106.0865952 | 73   | 0.006916248                                   | 31.19%                                               | 0.155668                   |
| UVMR: Combined-sex instrument  |         |       |                         |             |          |      |                               |                                      |        |                                       |                                |             |      |                                               |                                                      |                            |
| BMI                            | PCa     | 545   | 0.91(0.86-0.97)         | 0.0038      | 863.7619 | 544  | 6.14E-17                      | 37.02%                               | 540    | 0.91(0.86-0.96)                       | 0.0016                         | 797.2781599 | 539  | 2.70E-12                                      | 32.39%                                               | 0.440606                   |
| WHR                            | PCa     | 253   | 0..97(0.88-1.06)        | 0.47        | 450.5407 | 252  | 2.12E-13                      | 44.07%                               | 250    | 0.95(0.87-1.04)                       | 0.24                           | 412.3618187 | 249  | 3.35E-10                                      | 39.62%                                               | 0.726876                   |
| WHRadjBMI                      | PCa     | 287   | 1.02(0.94-1.11)         | 0.58        | 538.8113 | 286  | 1.02E-17                      | 46.92%                               | 283    | 1.00(0.93-1.08)                       | 0.99                           | 445.7558881 | 282  | 1.69E-09                                      | 36.74%                                               | 0.22656                    |
| UVMR                           |         |       |                         |             |          |      |                               |                                      |        |                                       |                                |             |      |                                               |                                                      |                            |
| BT                             | PCa     | 65    | 1.20 (1.09-1.33)        | 0.00037     | 134.1637 | 64   | 6.86E-07                      | 52.30%                               | 62     | 1.15 (1.06-1.24)                      | 0.000404                       | 74.32260959 | 61   | 0.117521678                                   | 17.93%                                               | 0.635638                   |
| SHBG                           | PCa     | 217   | 0.89(0.78-1.03)         | 0.11        | 724.0862 | 216  | 4.14E-56                      | 70.17%                               | 206    | 0.97 (0.87-1.08)                      | 0.594901797                    | 378.4357325 | 205  | 1.93E-12                                      | 45.83%                                               | 0.218332                   |
| TT                             | PCa     | 141   | 0.98(0.91-1.06)         | 0.69        | 407.3853 | 140  | 6.33E-28                      | 65.63%                               | 131    | 1.02 (0.96-1.08)                      | 0.520159003                    | 205.7216959 | 130  | 2.60E-05                                      | 36.81%                                               | 0.781029                   |
| Bidirectional MR               |         |       |                         |             |          |      |                               |                                      |        |                                       |                                |             |      |                                               |                                                      |                            |
| BMI                            | BT      | 198   | -0.24(-0.28--0.21)      | 2.12E-45    | 506.6745 | 197  | 3.71E-29                      | 61.12%                               | 188    | -0.27(-0.3 - -0.24)                   | 7.35E-84                       | 298.2227699 | 187  | 4.19E-07                                      | 37.30%                                               | 0.622068                   |
| BT                             | BMI     | 69    | -0.019 (-0.071 - 0.033) | 0.48        | 401.4825 | 68   | 8.81E-49                      | 83.06%                               | 62     | -0.02 ( -0.06 - 0.02)                 | 0.335811504                    | 155.1648993 | 61   | 3.75E-10                                      | 60.69%                                               | 0.372557                   |



Supplementary Table S6: Results for obesity-related traits effect on prostate cancer.

BMI, Body Mass Index; WHR, waist-to-hip ratio; WHRadjBMI, waist-to-hip ratio adjusted for body mass index; PCa, prostate cancer; SNP, single nucleotide polymorphism; IVW, inverse variance weighted; MR-PRESSO, MR Pleiotropy RESidual Sum and Outlier; UVMR, univariable MR; BT, Bioavailable testosterone; TT, total testosterone; SHBG, sex hormone-binding globulin; SD, standard deviation; OR, odds ratio; se, standard error; ci, confidence interval;

| exposure                                  | outcome         | method                    | nsnp | b        | se       | pval     | lo_ci    | up_ci    | or       | or_lci95 | or_uci95 |
|-------------------------------------------|-----------------|---------------------------|------|----------|----------|----------|----------|----------|----------|----------|----------|
| Male-specific instrument—before MR-PRESSO |                 |                           |      |          |          |          |          |          |          |          |          |
| BMI                                       | Prostate Cancer | Inverse variance weighted | 193  | -0.05931 | 0.037004 | 0.108965 | -0.13184 | 0.013215 | 0.942413 | 0.876482 | 1.013303 |
|                                           |                 | MR Egger                  | 193  | -0.2293  | 0.099053 | 0.021682 | -0.42344 | -0.03515 | 0.795092 | 0.654789 | 0.965457 |
|                                           |                 | Weighted median           | 193  | -0.11766 | 0.051358 | 0.021968 | -0.21832 | -0.017   | 0.889    | 0.803868 | 0.983148 |
|                                           |                 | Weighted mode             | 193  | -0.15862 | 0.083487 | 0.058942 | -0.32225 | 0.005016 | 0.853322 | 0.724515 | 1.005028 |
| Male-specific instrument—after MR-PRESSO  |                 |                           |      |          |          |          |          |          |          |          |          |
| BMI                                       | Prostate Cancer | Inverse variance weighted | 191  | -0.07122 | 0.035988 | 0.04782  | -0.14175 | -0.00068 | 0.931259 | 0.867835 | 0.999318 |
|                                           |                 | MR Egger                  | 191  | -0.23245 | 0.096003 | 0.016409 | -0.42062 | -0.04429 | 0.792585 | 0.656639 | 0.956677 |
|                                           |                 | Weighted median           | 191  | -0.11981 | 0.050138 | 0.016868 | -0.21808 | -0.02154 | 0.88709  | 0.804061 | 0.978692 |
|                                           |                 | Weighted mode             | 191  | -0.15805 | 0.091004 | 0.084055 | -0.33642 | 0.020318 | 0.853808 | 0.714326 | 1.020526 |
| Male-specific instrument—before MR-PRESSO |                 |                           |      |          |          |          |          |          |          |          |          |
| WHR                                       | Prostate Cancer | Inverse variance weighted | 64   | 0.047859 | 0.0902   | 0.595704 | -0.12893 | 0.224651 | 1.049023 | 0.879033 | 1.251886 |
|                                           |                 | MR Egger                  | 64   | -0.50504 | 0.322615 | 0.122563 | -1.13737 | 0.127282 | 0.603479 | 0.320662 | 1.135737 |
|                                           |                 | Weighted median           | 64   | 0.016299 | 0.085368 | 0.848585 | -0.15102 | 0.183621 | 1.016432 | 0.859828 | 1.20156  |
|                                           |                 | Weighted mode             | 64   | 0.030701 | 0.163028 | 0.851233 | -0.28883 | 0.350236 | 1.031177 | 0.749137 | 1.419402 |
| Male-specific instrument—after MR-PRESSO  |                 |                           |      |          |          |          |          |          |          |          |          |
| WHR                                       | Prostate Cancer | Inverse variance weighted | 59   | -0.02242 | 0.075052 | 0.765194 | -0.16952 | 0.124687 | 0.977834 | 0.844072 | 1.132793 |
|                                           |                 | MR Egger                  | 59   | -0.46451 | 0.259303 | 0.078542 | -0.97275 | 0.043723 | 0.628442 | 0.378044 | 1.044693 |
|                                           |                 | Weighted median           | 59   | 0.0046   | 0.090986 | 0.959674 | -0.17373 | 0.182933 | 1.004611 | 0.840522 | 1.200734 |
|                                           |                 | Weighted mode             | 59   | 0.043737 | 0.189541 | 0.81832  | -0.32776 | 0.415238 | 1.044707 | 0.720533 | 1.514731 |
| Male-specific instrument—before MR-PRESSO |                 |                           |      |          |          |          |          |          |          |          |          |
| WHRadjBMI                                 | Prostate Cancer | Inverse variance weighted | 79   | -0.00359 | 0.070594 | 0.959405 | -0.14196 | 0.134772 | 0.996413 | 0.867658 | 1.144275 |
|                                           |                 | MR Egger                  | 79   | 0.414738 | 0.218947 | 0.061949 | -0.0144  | 0.843874 | 1.513974 | 0.985705 | 2.325358 |
|                                           |                 | Weighted median           | 79   | 0.02577  | 0.070527 | 0.714822 | -0.11246 | 0.164003 | 1.026105 | 0.89363  | 1.178218 |
|                                           |                 | Weighted mode             | 79   | 0.119726 | 0.118363 | 0.314897 | -0.11227 | 0.351718 | 1.127188 | 0.893807 | 1.421508 |
| Male-specific instrument—after MR-PRESSO  |                 |                           |      |          |          |          |          |          |          |          |          |
| WHRadjBMI                                 | Prostate Cancer | Inverse variance weighted | 74   | -0.05841 | 0.056118 | 0.297954 | -0.1684  | 0.051582 | 0.943264 | 0.845015 | 1.052936 |

|                                                 |  |                           |     |          |          |          |          |          |          |          |          |
|-------------------------------------------------|--|---------------------------|-----|----------|----------|----------|----------|----------|----------|----------|----------|
|                                                 |  | MR Egger                  | 74  | 0.180788 | 0.175773 | 0.307143 | -0.16373 | 0.525304 | 1.198161 | 0.848974 | 1.690972 |
|                                                 |  | Weighted median           | 74  | 0.013498 | 0.068747 | 0.844345 | -0.12125 | 0.148243 | 1.013589 | 0.885815 | 1.159794 |
|                                                 |  | Weighted mode             | 74  | 0.132231 | 0.119585 | 0.272465 | -0.10216 | 0.366618 | 1.141372 | 0.902889 | 1.442846 |
| <b>Combined-sex instrument—before MR-PRESSO</b> |  |                           |     |          |          |          |          |          |          |          |          |
|                                                 |  | Inverse variance weighted | 545 | -0.09013 | 0.031168 | 0.003831 | -0.15122 | -0.02904 | 0.913812 | 0.859658 | 0.971377 |
|                                                 |  | MR Egger                  | 545 | -0.14278 | 0.08327  | 0.086985 | -0.30599 | 0.020433 | 0.866947 | 0.736396 | 1.020643 |
|                                                 |  | Weighted median           | 545 | -0.14227 | 0.045886 | 0.001932 | -0.23221 | -0.05233 | 0.867388 | 0.792783 | 0.949013 |
|                                                 |  | Weighted mode             | 545 | -0.24788 | 0.088228 | 0.005139 | -0.42081 | -0.07496 | 0.780451 | 0.656515 | 0.927784 |
| <b>Combined-sex instrument—after MR-PRESSO</b>  |  |                           |     |          |          |          |          |          |          |          |          |
|                                                 |  | Inverse variance weighted | 540 | -0.09543 | 0.030304 | 0.001639 | -0.15482 | -0.03603 | 0.908986 | 0.856568 | 0.964613 |
|                                                 |  | MR Egger                  | 540 | -0.15317 | 0.080736 | 0.058335 | -0.31142 | 0.005069 | 0.857981 | 0.732409 | 1.005082 |
|                                                 |  | Weighted median           | 540 | -0.14672 | 0.046594 | 0.001638 | -0.23805 | -0.0554  | 0.863532 | 0.788164 | 0.946107 |
|                                                 |  | Weighted mode             | 540 | -0.24734 | 0.081488 | 0.002519 | -0.40706 | -0.08763 | 0.780874 | 0.665605 | 0.916104 |
| <b>Combined-sex instrument—before MR-PRESSO</b> |  |                           |     |          |          |          |          |          |          |          |          |
|                                                 |  | Inverse variance weighted | 253 | -0.03395 | 0.046639 | 0.466662 | -0.12536 | 0.057463 | 0.96662  | 0.882177 | 1.059146 |
|                                                 |  | MR Egger                  | 253 | -0.13373 | 0.130314 | 0.305782 | -0.38914 | 0.121686 | 0.874827 | 0.677637 | 1.129399 |
|                                                 |  | Weighted median           | 253 | -0.00116 | 0.063721 | 0.985453 | -0.12605 | 0.123731 | 0.998839 | 0.881566 | 1.131712 |
|                                                 |  | Weighted mode             | 253 | 0.051024 | 0.1291   | 0.693007 | -0.20201 | 0.30406  | 1.052348 | 0.817086 | 1.35535  |
| <b>Combined-sex instrument—after MR-PRESSO</b>  |  |                           |     |          |          |          |          |          |          |          |          |
|                                                 |  | Inverse variance weighted | 250 | -0.05304 | 0.045064 | 0.239155 | -0.14137 | 0.035281 | 0.948337 | 0.868168 | 1.03591  |
|                                                 |  | MR Egger                  | 250 | -0.09413 | 0.125879 | 0.455279 | -0.34086 | 0.152588 | 0.910161 | 0.711161 | 1.164845 |
|                                                 |  | Weighted median           | 250 | -0.00225 | 0.065093 | 0.972388 | -0.12984 | 0.125329 | 0.997749 | 0.87824  | 1.133521 |
|                                                 |  | Weighted mode             | 250 | 0.056947 | 0.126666 | 0.653401 | -0.19132 | 0.305213 | 1.0586   | 0.82587  | 1.356914 |
| <b>Combined-sex instrument—before MR-PRESSO</b> |  |                           |     |          |          |          |          |          |          |          |          |
|                                                 |  | Inverse variance weighted | 287 | 0.022993 | 0.041654 | 0.58094  | -0.05865 | 0.104635 | 1.02326  | 0.943039 | 1.110305 |
|                                                 |  | MR Egger                  | 287 | 0.132865 | 0.102163 | 0.194475 | -0.06737 | 0.333104 | 1.142095 | 0.934845 | 1.395292 |
|                                                 |  | Weighted median           | 287 | 0.021965 | 0.058658 | 0.708058 | -0.093   | 0.136934 | 1.022208 | 0.91119  | 1.146753 |
|                                                 |  | Weighted mode             | 287 | 0.093761 | 0.082805 | 0.258453 | -0.06854 | 0.256058 | 1.098297 | 0.933759 | 1.291828 |
| <b>Combined-sex instrument—after MR-PRESSO</b>  |  |                           |     |          |          |          |          |          |          |          |          |
|                                                 |  | Inverse variance weighted | 283 | -0.00028 | 0.038449 | 0.994116 | -0.07564 | 0.075077 | 0.999716 | 0.927146 | 1.077967 |
|                                                 |  | MR Egger                  | 283 | 0.10339  | 0.093775 | 0.271174 | -0.08041 | 0.28719  | 1.108924 | 0.922739 | 1.332677 |
|                                                 |  | Weighted median           | 283 | 0.02127  | 0.057304 | 0.710505 | -0.09105 | 0.133587 | 1.021498 | 0.912975 | 1.14292  |
|                                                 |  | Weighted mode             | 283 | 0.093309 | 0.08259  | 0.259527 | -0.06857 | 0.255184 | 1.0978   | 0.933731 | 1.290699 |

Supplementary Table S7: results for serum testosterone effect on prostate cancer.

SNP, single nucleotide polymorphism; IVW, inverse variance weighted; MR-PRESSO, MR Pleiotropy RESidual Sum and Outlier; UVMR, univariable MR; BT, Bioavailable testosterone; TT, total testosterone; SHBG, sex hormone-binding globulin; SD, standard deviation; OR, odds ratio; se, standard error; ci, confidence interval;

| exposure         | outcome         | method                    | nsnp | b          | se         | pval       | lo_ci      | up_ci      | or         | or_lci95   | or_uci95   |
|------------------|-----------------|---------------------------|------|------------|------------|------------|------------|------------|------------|------------|------------|
| before MR-PRESSO |                 |                           |      |            |            |            |            |            |            |            |            |
| BT               | Prostate Cancer | Inverse variance weighted | 65   | 0.18312986 | 0.05144688 | 0.00037143 | 0.08229399 | 0.28396574 | 1.20097036 | 1.08577497 | 1.32838742 |
|                  |                 | MR Egger                  | 65   | 0.08230088 | 0.10032903 | 0.41513256 | -0.114344  | 0.27894577 | 1.08578245 | 0.89195106 | 1.32173567 |
|                  |                 | Weighted median           | 65   | 0.11853061 | 0.05766894 | 0.03984395 | 0.00549949 | 0.23156174 | 1.12584134 | 1.00551464 | 1.26056716 |
|                  |                 | Weighted mode             | 65   | 0.11811317 | 0.05727051 | 0.0432363  | 0.00586298 | 0.23036336 | 1.12537146 | 1.0058802  | 1.25905742 |
| after MR-PRESSO  |                 |                           |      |            |            |            |            |            |            |            |            |
| BT               | Prostate Cancer | Inverse variance weighted | 62   | 0.14042161 | 0.0396999  | 0.00040458 | 0.0626098  | 0.21823343 | 1.15075887 | 1.06461135 | 1.24387739 |
|                  |                 | MR Egger                  | 62   | 0.10880701 | 0.07748061 | 0.16538127 | -0.043055  | 0.26066902 | 1.11494716 | 0.95785871 | 1.29779805 |
|                  |                 | Weighted median           | 62   | 0.11710095 | 0.05908073 | 0.04747367 | 0.00130272 | 0.23289919 | 1.12423292 | 1.00130357 | 1.26225423 |
|                  |                 | Weighted mode             | 62   | 0.11860694 | 0.06006062 | 0.05282333 | 0.00088813 | 0.23632575 | 1.12592727 | 1.00088852 | 1.26658684 |
| before MR-PRESSO |                 |                           |      |            |            |            |            |            |            |            |            |
| SHBG             | Prostate Cancer | Inverse variance weighted | 217  | -0.1130695 | 0.07117861 | 0.11216612 | -0.2525796 | 0.02644058 | 0.89308859 | 0.7767944  | 1.02679324 |
|                  |                 | MR Egger                  | 217  | -0.0290163 | 0.10502611 | 0.78260094 | -0.2348674 | 0.17683491 | 0.97140066 | 0.79067565 | 1.19343406 |
|                  |                 | Weighted median           | 217  | -0.020676  | 0.07331094 | 0.7779191  | -0.1643655 | 0.12301342 | 0.97953627 | 0.84843191 | 1.13089959 |
|                  |                 | Weighted mode             | 217  | -0.024377  | 0.06458585 | 0.70622096 | -0.1509652 | 0.1022113  | 0.97591776 | 0.85987761 | 1.10761749 |
| after MR-PRESSO  |                 |                           |      |            |            |            |            |            |            |            |            |
| SHBG             | Prostate Cancer | Inverse variance weighted | 206  | -0.029259  | 0.05502433 | 0.5949018  | -0.1371067 | 0.07858871 | 0.97116492 | 0.87187723 | 1.08175931 |
|                  |                 | MR Egger                  | 206  | 0.04449646 | 0.08116527 | 0.58413996 | -0.1145875 | 0.20358038 | 1.04550127 | 0.89173394 | 1.22578368 |
|                  |                 | Weighted median           | 206  | -0.0205699 | 0.07383961 | 0.7805705  | -0.1652956 | 0.12415572 | 0.9796402  | 0.84764314 | 1.13219216 |
|                  |                 | Weighted mode             | 206  | -0.0194254 | 0.06419688 | 0.762508   | -0.1452513 | 0.10640045 | 0.98076203 | 0.86480494 | 1.11226719 |
| before MR-PRESSO |                 |                           |      |            |            |            |            |            |            |            |            |
| TT               | Prostate Cancer | Inverse variance weighted | 141  | -0.0153019 | 0.03932854 | 0.69721861 | -0.0923858 | 0.06178207 | 0.98481462 | 0.91175334 | 1.0637305  |
|                  |                 | MR Egger                  | 141  | -0.0321726 | 0.0652947  | 0.62298142 | -0.1601502 | 0.09580502 | 0.96833943 | 0.85201579 | 1.10054445 |
|                  |                 | Weighted median           | 141  | -0.0086685 | 0.04272722 | 0.83922807 | -0.0924139 | 0.0750768  | 0.99136892 | 0.91172772 | 1.07796694 |
|                  |                 | Weighted mode             | 141  | 0.02659905 | 0.04206222 | 0.52817405 | -0.0558429 | 0.109041   | 1.02695596 | 0.94568768 | 1.11520808 |
| after MR-PRESSO  |                 |                           |      |            |            |            |            |            |            |            |            |
| TT               | Prostate Cancer | Inverse variance weighted | 131  | 0.01937003 | 0.03011976 | 0.520159   | -0.0396647 | 0.07840476 | 1.01955885 | 0.96111164 | 1.08156035 |
|                  |                 | MR Egger                  | 131  | 0.00801573 | 0.05074569 | 0.87473626 | -0.0914458 | 0.10747729 | 1.00804794 | 0.91261075 | 1.11346557 |

|                 |     |            |            |            |            |            |            |            |            |
|-----------------|-----|------------|------------|------------|------------|------------|------------|------------|------------|
| Weighted median | 131 | -0.0075806 | 0.04307262 | 0.86029769 | -0.0920029 | 0.07684176 | 0.99244808 | 0.91210249 | 1.07987118 |
| Weighted mode   | 131 | 0.03213156 | 0.04244494 | 0.45040926 | -0.0510605 | 0.11532364 | 1.03265335 | 0.95022116 | 1.12223658 |

Supplementary Table S8: results for bidirectional MR between BMI and BT.

| exposure         | outcome | method                    | nsnp | b          | se         | pval       | lo_ci      | up_ci      | or         | or_lci95   | or_uci95   |
|------------------|---------|---------------------------|------|------------|------------|------------|------------|------------|------------|------------|------------|
| before MR-PRESSO |         |                           |      |            |            |            |            |            |            |            |            |
| BMI              | BT      | Inverse variance weighted | 198  | -0.2440218 | 0.01725609 | 2.12E-45   | -0.2778438 | -0.2101999 | 0.78347052 | 0.75741514 | 0.81042222 |
|                  |         | MR Egger                  | 198  | -0.2491881 | 0.04715163 | 3.34E-07   | -0.3416053 | -0.1567709 | 0.77943333 | 0.71062863 | 0.85489987 |
|                  |         | Weighted median           | 198  | -0.2655171 | 0.02169006 | 1.87E-34   | -0.3080296 | -0.2230046 | 0.76680934 | 0.73489356 | 0.80011119 |
|                  |         | Weighted mode             | 198  | -0.2725041 | 0.02861992 | 6.39E-18   | -0.3285991 | -0.216409  | 0.76147032 | 0.71993156 | 0.8054058  |
| after MR-PRESSO  |         |                           |      |            |            |            |            |            |            |            |            |
| BMI              | BT      | Inverse variance weighted | 188  | -0.2698282 | 0.01390685 | 7.35E-84   | -0.2970856 | -0.2425707 | 0.76351068 | 0.74298042 | 0.78460825 |
|                  |         | MR Egger                  | 188  | -0.2872297 | 0.03789887 | 1.60E-12   | -0.3615115 | -0.212948  | 0.75033932 | 0.69662256 | 0.8081982  |
|                  |         | Weighted median           | 188  | -0.2666786 | 0.01993007 | 7.84E-41   | -0.3057416 | -0.2276157 | 0.76591916 | 0.73657693 | 0.79643027 |
|                  |         | Weighted mode             | 188  | -0.2747692 | 0.0269502  | 1.09E-19   | -0.3275916 | -0.2219468 | 0.75974742 | 0.72065725 | 0.80095793 |
| before MR-PRESSO |         |                           |      |            |            |            |            |            |            |            |            |
| BT               | BMI     | Inverse variance weighted | 69   | -0.0187263 | 0.02664502 | 0.4821752  | -0.0709506 | 0.03349789 | 0.98144791 | 0.93150793 | 1.03406527 |
|                  |         | MR Egger                  | 69   | 0.0416628  | 0.05099848 | 0.41685703 | -0.0582942 | 0.14161981 | 1.04254287 | 0.94337235 | 1.15213853 |
|                  |         | Weighted median           | 69   | -0.003611  | 0.01935627 | 0.85201065 | -0.0415493 | 0.03432731 | 0.99639553 | 0.95930207 | 1.03492329 |
|                  |         | Weighted mode             | 69   | 0.00925942 | 0.02065276 | 0.65533441 | -0.03122   | 0.04973882 | 1.00930242 | 0.96926233 | 1.05099656 |
| after MR-PRESSO  |         |                           |      |            |            |            |            |            |            |            |            |
| BMI              | BT      | Inverse variance weighted | 62   | -0.0181813 | 0.01889013 | 0.3358115  | -0.0552059 | 0.0188434  | 0.98198302 | 0.94629027 | 1.01902205 |
|                  |         | MR Egger                  | 62   | 0.0089063  | 0.0355952  | 0.80327928 | -0.0608603 | 0.07867289 | 1.00894607 | 0.94095468 | 1.08185039 |
|                  |         | Weighted median           | 62   | -0.0085762 | 0.01993873 | 0.66710383 | -0.0476561 | 0.03050374 | 0.9914605  | 0.95346165 | 1.03097374 |
|                  |         | Weighted mode             | 62   | 0.00576069 | 0.01978838 | 0.77195103 | -0.0330245 | 0.04454592 | 1.00577732 | 0.96751482 | 1.04555299 |

**Supplementary Table S9: Results for MVMR.**

BMI, Body Mass Index; SNP, single nucleotide polymorphism; IVW, inverse variance weighted; BT, Bioavailable testosterone; OR, odds ratio; se, standard error; ci, confidence interval;

| exposure              | outcome | method | or         | or_lci95   | or_uci95   | P value    |
|-----------------------|---------|--------|------------|------------|------------|------------|
| BMI (adjusted for BT) | PCa     | IVW    | 0.97040967 | 0.89950517 | 1.0469033  | 0.43859528 |
| BT (adjusted for BMI) | Pca     | IVW    | 1.15669063 | 1.05524373 | 1.26789023 | 0.00212183 |

Supplementary Table S10: STROBE-MR checklist of recommended items to address in reports of Mendelian randomization studies.<sup>i</sup>

| Item No.            | Section                                   | Checklist item                                                                                                                                                                                                                            | Page No.   | Relevant text from manuscript |
|---------------------|-------------------------------------------|-------------------------------------------------------------------------------------------------------------------------------------------------------------------------------------------------------------------------------------------|------------|-------------------------------|
| 1                   | <b>TITLE and ABSTRACT</b>                 | Indicate Mendelian randomization (MR) as the study's design in the title and/or the abstract if that is a main purpose of the study                                                                                                       | <b>1-2</b> | <b>Line 1-63</b>              |
| <b>INTRODUCTION</b> |                                           |                                                                                                                                                                                                                                           |            |                               |
| 2                   | <b>Background</b>                         | Explain the scientific background and rationale for the reported study. What is the exposure? Is a potential causal relationship between exposure and outcome plausible? Justify why MR is a helpful method to address the study question | <b>3</b>   | <b>Line 67-102</b>            |
| 3                   | <b>Objectives</b>                         | State specific objectives clearly, including pre-specified causal hypotheses (if any). State that MR is a method that, under specific assumptions, intends to estimate causal effects                                                     | <b>3</b>   | <b>Line 104-109</b>           |
| <b>METHODS</b>      |                                           |                                                                                                                                                                                                                                           |            |                               |
| 4                   | <b>Study design and data sources</b>      | Present key elements of the study design early in the article. Consider including a table listing sources of data for all phases of the study. For each data source contributing to the analysis, describe the following:                 | <b>4-6</b> | <b>Line 113-228</b>           |
|                     | a)                                        | Setting: Describe the study design and the underlying population, if possible. Describe the setting, locations, and relevant dates, including periods of recruitment, exposure, follow-up, and data collection, when available.           | <b>4</b>   | <b>Line 115-124</b>           |
|                     | b)                                        | Participants: Give the eligibility criteria, and the sources and methods of selection of participants. Report the sample size, and whether any power or sample size calculations were carried out prior to the main analysis              | <b>4-5</b> | <b>Line 127-170</b>           |
|                     | c)                                        | Describe measurement, quality control and selection of genetic variants                                                                                                                                                                   | <b>6</b>   | <b>Line 203-214</b>           |
|                     | d)                                        | For each exposure, outcome, and other relevant variables, describe methods of assessment and diagnostic criteria for diseases                                                                                                             | <b>4-5</b> | <b>Line 127-170</b>           |
|                     | e)                                        | Provide details of ethics committee approval and participant informed consent, if relevant                                                                                                                                                | <b>11</b>  | <b>Line 393-395</b>           |
| 5                   | <b>Assumptions</b>                        | Explicitly state the three core IV assumptions for the main analysis (relevance, independence and exclusion restriction) as well assumptions for any additional or sensitivity analysis                                                   | <b>6</b>   | <b>Line 202-228</b>           |
| 6                   | <b>Statistical methods: main analysis</b> | Describe statistical methods and statistics used                                                                                                                                                                                          | <b>5</b>   | <b>Line 174-200</b>           |

|   |                                                     |                                                                                                                                                                                                                                      |     |                                       |
|---|-----------------------------------------------------|--------------------------------------------------------------------------------------------------------------------------------------------------------------------------------------------------------------------------------------|-----|---------------------------------------|
|   | a)                                                  | Describe how quantitative variables were handled in the analyses (i.e., scale, units, model)                                                                                                                                         | 6   | Line 225-228<br>Supplementary table 1 |
|   | b)                                                  | Describe how genetic variants were handled in the analyses and, if applicable, how their weights were selected                                                                                                                       | 6   | Line 225-228<br>Supplementary table 1 |
|   | c)                                                  | Describe the MR estimator (e.g. two-stage least squares, Wald ratio) and related statistics. Detail the included covariates and, in case of two-sample MR, whether the same covariate set was used for adjustment in the two samples | 5   | Line 174-200                          |
|   | d)                                                  | Explain how missing data were addressed                                                                                                                                                                                              | 6   | Line 203-214                          |
|   | e)                                                  | If applicable, indicate how multiple testing was addressed                                                                                                                                                                           | N/A | N/A                                   |
| 7 | <b>Assessment of assumptions</b>                    | Describe any methods or prior knowledge used to assess the assumptions or justify their validity                                                                                                                                     | 6   | Line 203-214                          |
| 8 | <b>Sensitivity analyses and additional analyses</b> | Describe any sensitivity analyses or additional analyses performed (e.g. comparison of effect estimates from different approaches, independent replication, bias analytic techniques, validation of instruments, simulations)        | 5   | Line 182-188                          |
| 9 | <b>Software and pre-registration</b>                |                                                                                                                                                                                                                                      |     |                                       |
|   | a)                                                  | Name statistical software and package(s), including version and settings used                                                                                                                                                        | 6   | Line 197-200                          |
|   | b)                                                  | State whether the study protocol and details were pre-registered (as well as when and where)                                                                                                                                         | N/A | N/A                                   |

## RESULTS

|    |                         |                                                                                                                                                                                                                                                                     |     |                                              |
|----|-------------------------|---------------------------------------------------------------------------------------------------------------------------------------------------------------------------------------------------------------------------------------------------------------------|-----|----------------------------------------------|
| 10 | <b>Descriptive data</b> |                                                                                                                                                                                                                                                                     |     |                                              |
|    | a)                      | Report the numbers of individuals at each stage of included studies and reasons for exclusion. Consider use of a flow diagram                                                                                                                                       | 6-7 | Line 233-238<br>Line 256-258<br>Line 269-270 |
|    | b)                      | Report summary statistics for phenotypic exposure(s), outcome(s), and other relevant variables (e.g. means, SDs, proportions)                                                                                                                                       | N/A | Supplementary table 5-9                      |
|    | c)                      | If the data sources include meta-analyses of previous studies, provide the assessments of heterogeneity across these studies                                                                                                                                        | N/A | N/A                                          |
|    | d)                      | For two-sample MR:<br>i. Provide justification of the similarity of the genetic variant-exposure associations between the exposure and outcome samples<br>ii. Provide information on the number of individuals who overlap between the exposure and outcome studies | 4-4 | Line 129-170<br>Supplementary table 1        |



## 11 Main results

|    |                                                                                                                                                                                                              |     |                                         |
|----|--------------------------------------------------------------------------------------------------------------------------------------------------------------------------------------------------------------|-----|-----------------------------------------|
| a) | Report the associations between genetic variant and exposure, and between genetic variant and outcome, preferably on an interpretable scale                                                                  | 6-8 | Line 233-286<br>Supplementary table 5-9 |
| b) | Report MR estimates of the relationship between exposure and outcome, and the measures of uncertainty from the MR analysis, on an interpretable scale, such as odds ratio or relative risk per SD difference | 6-8 | Line 233-286<br>Supplementary table 5-9 |
| c) | If relevant, consider translating estimates of relative risk into absolute risk for a meaningful time period                                                                                                 | N/A | N/A                                     |
| d) | Consider plots to visualize results (e.g. forest plot, scatterplot of associations between genetic variants and outcome versus between genetic variants and exposure)                                        | N/A | fig 1-4                                 |

## 12 Assessment of assumptions

|    |                                                                                                                                       |     |                                                                         |
|----|---------------------------------------------------------------------------------------------------------------------------------------|-----|-------------------------------------------------------------------------|
| a) | Report the assessment of the validity of the assumptions                                                                              | 6-7 | Line 233-238<br>Line 256-258<br>Line 269-270                            |
| b) | Report any additional statistics (e.g., assessments of heterogeneity across genetic variants, such as $I^2$ , Q statistic or E-value) | 6-8 | Line 248-253<br>Line 264-266<br>Line 275-277<br>Supplementary table 2-4 |

## 13 Sensitivity analyses and additional analyses

|    |                                                                                                               |     |                                                                         |
|----|---------------------------------------------------------------------------------------------------------------|-----|-------------------------------------------------------------------------|
| a) | Report any sensitivity analyses to assess the robustness of the main results to violations of the assumptions | 6-8 | Line 239-243<br>Line 259-263<br>Line 211-274<br>Supplementary table 5-9 |
| b) | Report results from other sensitivity analyses or additional analyses                                         | 6-8 | Line 239-243<br>Line 259-263<br>Line 211-274<br>Supplementary table 5-9 |
| c) | Report any assessment of direction of causal relationship (e.g., bidirectional MR)                            | 7   | Line 268-277                                                            |
| d) | When relevant, report and compare with estimates from non-MR analyses                                         | N/A | N/A                                                                     |
| e) | Consider additional plots to visualize results (e.g., leave-one-out analyses)                                 | N/A | Fig 1-4                                                                 |

| <b>DISCUSSION</b>        |                              |                                                                                                                                                                                                                                                                                                                                                      |            |                     |
|--------------------------|------------------------------|------------------------------------------------------------------------------------------------------------------------------------------------------------------------------------------------------------------------------------------------------------------------------------------------------------------------------------------------------|------------|---------------------|
| 14                       | <b>Key results</b>           | Summarize key results with reference to study objectives                                                                                                                                                                                                                                                                                             | <b>8</b>   | <b>Line 290-299</b> |
| 15                       | <b>Limitations</b>           | Discuss limitations of the study, taking into account the validity of the IV assumptions, other sources of potential bias, and imprecision. Discuss both direction and magnitude of any potential bias and any efforts to address them                                                                                                               | <b>9</b>   | <b>Line 362-267</b> |
| 16                       | <b>Interpretation</b>        |                                                                                                                                                                                                                                                                                                                                                      |            |                     |
|                          | a)                           | Meaning: Give a cautious overall interpretation of results in the context of their limitations and in comparison with other studies                                                                                                                                                                                                                  | <b>8-9</b> | <b>Line 301-351</b> |
|                          | b)                           | Mechanism: Discuss underlying biological mechanisms that could drive a potential causal relationship between the investigated exposure and the outcome, and whether the gene-environment equivalence assumption is reasonable. Use causal language carefully, clarifying that IV estimates may provide causal effects only under certain assumptions | <b>8-9</b> | <b>Line 342-251</b> |
|                          | c)                           | Clinical relevance: Discuss whether the results have clinical or public policy relevance, and to what extent they inform effect sizes of possible interventions                                                                                                                                                                                      | <b>10</b>  | <b>Line 372-374</b> |
| 17                       | <b>Generalizability</b>      | Discuss the generalizability of the study results (a) to other populations, (b) across other exposure periods/timings, and (c) across other levels of exposure                                                                                                                                                                                       | <b>9</b>   | <b>Line 362-363</b> |
| <b>OTHER INFORMATION</b> |                              |                                                                                                                                                                                                                                                                                                                                                      |            |                     |
| 18                       | <b>Funding</b>               | Describe sources of funding and the role of funders in the present study and, if applicable, sources of funding for the databases and original study or studies on which the present study is based                                                                                                                                                  | <b>11</b>  | <b>Line 382-383</b> |
| 19                       | <b>Data and data sharing</b> | Provide the data used to perform all analyses or report where and how the data can be accessed, and reference these sources in the article. Provide the statistical code needed to reproduce the results in the article, or report whether the code is publicly accessible and if so, where                                                          | <b>4-5</b> | <b>Line 128-174</b> |
| 20                       | <b>Conflicts of Interest</b> | All authors should declare all potential conflicts of interest                                                                                                                                                                                                                                                                                       | <b>11</b>  | <b>Line 386</b>     |

---

<sup>i</sup> Skrivankova VW, Richmond RC, Woolf BAR, Yarmolinsky J, Davies NM, Swanson SA, VanderWeele TJ, Higgins JPT, Timpson NJ, Dimou N, Langenberg C, Golub RM, Loder EW, Gallo V, Tybjaerg-Hansen A, Davey Smith G, Egger M, Richards JB. Strengthening the Reporting of Observational Studies in Epidemiology Using Mendelian Randomization: The STROBE-MR Statement. *JAMA*. 2021 Oct 26;326(16):1614-1621. doi: 10.1001/jama.2021.18236. PMID: 34698778.

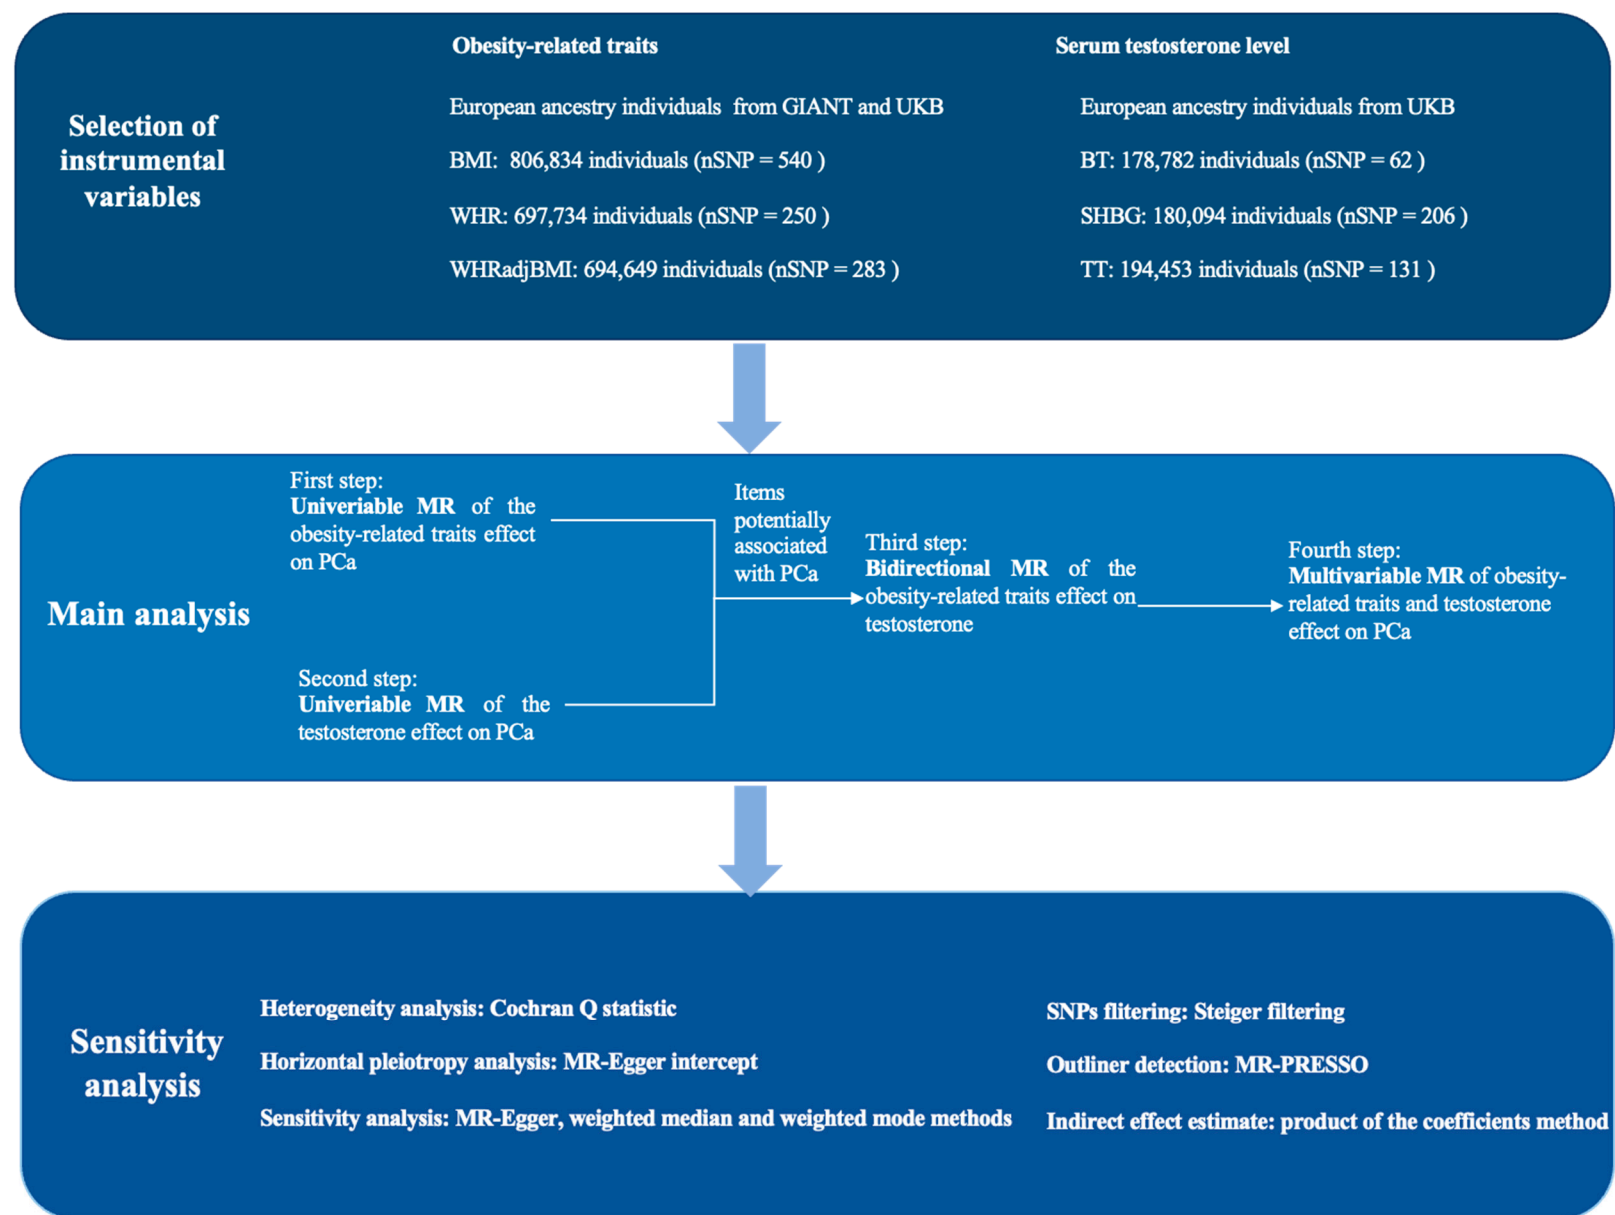

Supplementary Figure S1: Overview of the study design.

---

MR, Mendelian randomization; PCa, prostate cancer; BMI, Body Mass Index; WHR, waist-to-hip ratio; WHRadjBMI, waist-to-hip ratio adjusted for body mass index; SNP, single nucleotide polymorphism; UKB, UK biobank; PRACTICAL, Prostate Cancer Association Group to Investigate Cancer-Associated Alterations in the Genome; BT, Bioavailable testosterone; TT, total testosterone; SHBG, sex hormone-binding globulin
